# Supplementary material
Source: Royal Society of Chemistry journal article supplement (doi:10.1039/d6cc01421f)
Supplement: d6cc01421f1.pdf [file d6cc01421f1.pdf]

## Supporting Information for

# Crystallization-Driven Co-self-seeding Strategy Toward Controlled Preparation of Heterojunction Nanofibers

*Yunuo Song,<sup>a,#</sup> Fengfeng Huang,<sup>a,#</sup> Xiaoyu Huang,<sup>a,\*</sup> Guolin Lu,<sup>a</sup> Chun Feng<sup>a,b,\*</sup>*

# These authors contributed equally.

<sup>a</sup> Key Laboratory of Fluorine and Nitrogen Chemistry and Advanced Materials, Shanghai Institute of Organic Chemistry, University of Chinese Academy of Sciences, 345 Lingling Road, Shanghai 200032, People's Republic of China

<sup>b</sup> Shanghai Key Laboratory of Advanced Polymeric Materials, School of Materials Science and Engineering, East China University of Science and Technology, 130 Meilong Road, Shanghai 200237, People's Republic of China

\* To whom correspondence should be addressed, E-mail: cfeng@ecust.edu.cn (Tel: +86-21-54925606), xyhuang@mail.sioc.ac.cn (Tel: +86-21-54925310).

## SUPPORTING EXPERIMENTAL DETAILS

### Materials

All organic solvents such as tetrahydrofuran (THF) and ethanol (EtOH) were distilled prior to use. OPE<sub>9</sub>-*b*-P2VP<sub>56</sub>, BT-OPE<sub>7</sub>-BT-*b*-PNIPAM<sub>36</sub> were prepared according to previous reports. [1,2]

### Instrumentation

#### Transmission electron microscopy (TEM)

TEM images were obtained from a JEOL JEM-2100 instrument operated at 80 kV. A drop of micellar solution (10  $\mu$ L) was placed on a Formvar and carbon-coated copper grid for 30 s and the grid was allowed to dry at room temperature. For the samples stained by phosphotungstic acid, after the grid was dried (*ca.* 1 min after touching it with the filter paper), a drop of phosphotungstic acid aqueous solution (10  $\mu$ L, 1.0 mg/mL) was added onto the surface. The length, width and diameter distribution of micelles was determined by tracing more than 100 individual micelles and analysis using Image J software program from National Institutes of Health. Values of number-average length ( $L_n$ ), weight-average length ( $L_w$ ), number-average width ( $W_n$ ) and weight-average width ( $W_w$ ) of micelles were calculated as follows:

$$L_n = \frac{\sum_{i=1}^N N_i L_i}{\sum_{i=1}^N N_i} \quad (\text{S1})$$

$$L_w = \frac{\sum_{i=1}^N N_i L_i^2}{\sum_{i=1}^N N_i L_i} \quad (\text{S2})$$

$$W_n = \frac{\sum_{i=1}^N N_i W_i}{\sum_{i=1}^N N_i} \quad (\text{S3})$$

$$W_w = \frac{\sum_{i=1}^N N_i W_i^2}{\sum_{i=1}^N N_i W_i} \quad (\text{S4})$$

where  $N_i$  is the number of micelles of length  $L_i$  and width  $W_i$ , and  $N$  is the number of calculated micelles in each sample. The distribution of micellar length and width is characterized by  $L_w/L_n$  and  $W_w/W_n$ , respectively, and the standard deviation of the length and width distribution  $\sigma$ .

### UV/vis and fluorescence spectroscopy

UV/vis absorption spectra were recorded on a Hitachi U-2910 spectrophotometer. Fluorescence spectra were measured by using a Hitachi F-2700 fluorescence spectrophotometer with a 10 nm band width. UV/vis and fluorescence measurements were performed at room temperature.

### Photoluminescence excitation and emission spectrometry

The photoluminescence excitation and emission spectra were obtained on an

Edinburgh FLS1000 steady-state transient fluorescence spectrometer with a Xenon lamp. Micellar solutions of BT-OPE<sub>7</sub>-BT-*b*-PNIPAM<sub>36</sub> ( $2 \times 10^{-6}$  mol/L in ethanol), OPE<sub>9</sub>-*b*-P2VP<sub>56</sub> ( $2 \times 10^{-6}$  mol/L in ethanol) and heterojunction comicelles ( $2 \times 10^{-6}$  mol/L in ethanol) were subjected to photoluminescence analysis. For each sample, measurements were performed on deoxygenated solution (degassed by Ar bubbling). Photoluminescence excitation spectra were obtained with  $\lambda_{em} = 615$  nm for BT-OPE<sub>7</sub>-BT-*b*-PNIPAM<sub>36</sub>,  $\lambda_{em} = 534$  nm for OPE<sub>9</sub>-*b*-P2VP<sub>56</sub> and  $\lambda_{em} = 463$  nm for heterojunction comicelles, respectively. The following settings were used for the spectra acquisition: step 1.0 nm, dwell 0.2 s, repeat 1. Photoluminescence emission spectra were obtained with  $\lambda_{ex} = 423$  nm for BT-OPE<sub>7</sub>-BT-*b*-PNIPAM<sub>36</sub>,  $\lambda_{ex} = 419$  nm for OPE<sub>9</sub>-*b*-P2VP<sub>56</sub> and  $\lambda_{ex} = 409$  nm for heterojunction comicelles, respectively.

### **Time-correlated single photon counting (TCSPC)**

The time-resolved fluorescence spectroscopy (photoluminescence decay profile) was measured by using time-correlated single photon counting (TCSPC) mode. Micellar solutions of BT-OPE<sub>7</sub>-BT-*b*-PNIPAM<sub>36</sub> ( $2 \times 10^{-6}$  mol/L in ethanol), OPE<sub>9</sub>-*b*-P2VP<sub>56</sub> ( $2 \times 10^{-6}$  mol/L in ethanol) and heterojunction comicelles ( $2 \times 10^{-6}$  mol/L in ethanol) were subjected to TCSPC analysis. For each sample, measurements were performed on deoxygenated solution (degassed by Ar bubbling). Photoluminescence decay profiles were obtained on an Edinburgh FLS1000 steady-state transient fluorescence spectrometer with a picosecond pulsed diode (EPL) laser ( $\lambda_{ex} = 375$  nm) operating at 5 MHz and emission peak as detection wavelength ( $\lambda_{em} = 615$  nm for BT-

OPE<sub>7</sub>-BT-*b*-PNIPAM<sub>36</sub>,  $\lambda_{em} = 534$  nm for OPE<sub>9</sub>-*b*-P2VP<sub>56</sub> and  $\lambda_{em} = 463$  nm for heterojunction comicelles, respectively). The decay curves were fitted using a nonlinear method with a multiexponential decay law given by

$$I(t) = B_1 e^{(-t/\tau_1)} + B_2 e^{(-t/\tau_2)} + B_3 e^{(-t/\tau_3)} \quad (S5)$$

Where  $I$  is the fluorescence intensity at time,  $t$  is time,  $B_i$  is amplitude and  $\tau_i$  is one component fluorescence lifetime. And the “intensity-weighted” mean decay times  $\langle\tau\rangle$  were obtained by

$$\langle\tau\rangle = B_1\tau_1 + B_2\tau_2 + B_3\tau_3 \quad (B_1 + B_2 + B_3 = 1) \quad (S6)$$

## Self-assembly Experiments

### Preparation of comicelles of OPE<sub>9</sub>-*b*-P2VP<sub>56</sub> and BT-OPE<sub>7</sub>-BT-*b*-PNIPAM<sub>36</sub> by direct heating-cooling protocol

Concentrated THF solutions of BT-OPE<sub>7</sub>-BT-*b*-PNIPAM<sub>36</sub> (5 mg/mL) and OPE<sub>9</sub>-*b*-P2VP<sub>56</sub> (5 mg/mL) with mass ratio of  $M_{BT-OPE7-BT/OPE9} = 1/1$  were added into hot ethanol(80°C). Subsequently, the mixture were heated at 80°C for 1 h, followed by cooling/aging at 25°C for 24 h. A drop of solution was placed on a Formvar and carbon-coated copper grid and examined by TEM.

### Preparation of co-seed micelles of BT-OPE<sub>7</sub>-BT-*b*-PNIPAM<sub>36</sub>/OPE<sub>9</sub>-*b*-P2VP<sub>56</sub>

Co-seed micelles of BT-OPE<sub>7</sub>-BT-*b*-PNIPAM<sub>36</sub>/OPE<sub>9</sub>-*b*-P2VP<sub>56</sub> were prepared by sonicating (SONICS VC 750 ultrasonic processor, 30% power) the as-prepared polydisperse fiber-like comicelles obtained with  $M_{BT-OPE7-BT/OPE9} = 1/1$  at 0°C for 30 min, followed by aging at room temperature (25°C). A drop of solution was placed on

a Formvar and carbon-coated copper grid and examined by TEM.

### **Preparation of seed micelles of BT-OPE<sub>7</sub>-BT-*b*-PNIPAM<sub>36</sub> and OPE<sub>9</sub>-*b*-P2VP<sub>56</sub>**

Seed micelles of BT-OPE<sub>7</sub>-BT-*b*-PNIPAM<sub>36</sub> and OPE<sub>9</sub>-*b*-P2VP<sub>56</sub> were prepared by sonicating the corresponding polydisperse fiber-like micelles of BT-OPE<sub>7</sub>-BT-*b*-PNIPAM<sub>36</sub> (0.05 mg/mL) and OPE<sub>9</sub>-*b*-P2VP<sub>56</sub> (0.05 mg/mL) at 0°C for 30 min, followed by aging at room temperature (25°C), a drop of solution was placed on a Formvar and carbon-coated copper grid and examined by TEM.

### **Co-self-seeding of co-seed micelles of BT-OPE<sub>7</sub>-BT-*b*-PNIPAM<sub>36</sub>/OPE<sub>9</sub>-*b*-P2VP<sub>56</sub>**

Aliquots of co-seed micelles (0.05 mg/mL in ethanol) obtained from polydisperse comicelles of BT-OPE<sub>7</sub>-BT-*b*-PNIPAM<sub>36</sub>/OPE<sub>9</sub>-*b*-P2VP<sub>56</sub> with  $M_{\text{BT-OPE}_7\text{-BT/OPE}_9} = 1/1$  were annealed at different temperatures for 1 h, followed by cooling/aging at 25°C for 24 h. Characterization details are summarized in **Table S1**.

### **Co-self-seeding of mixture of individual seed micelles formed separately from BT-OPE<sub>7</sub>-BT-*b*-PNIPAM<sub>36</sub> and OPE<sub>9</sub>-*b*-P2VP<sub>56</sub>**

Individual seed micelles (0.05 mg/mL in ethanol) of BT-OPE<sub>7</sub>-BT-*b*-PNIPAM<sub>36</sub> (**Fig. S5A**,  $L_n = 40$  nm,  $L_w/L_n = 1.12$ ) and OPE<sub>9</sub>-*b*-P2VP<sub>56</sub> (**Fig. S5B**,  $L_n = 37$  nm,  $L_w/L_n = 1.08$ ) were firstly mixed together with  $M_{\text{BT-OPE}_7\text{-BT/OPE}_9} = 1/1$  to give mixture of seed micelles of BT-OPE<sub>7</sub>-BT-*b*-PNIPAM<sub>36</sub> and OPE<sub>9</sub>-*b*-P2VP<sub>56</sub> (total concentration of 0.05 mg/mL in ethanol). Aliquots of resulting mixture were annealed at different temperatures for 1 h, followed by cooling/aging at 25°C for 24 h. A drop of solution

was placed on a Formvar and carbon-coated copper grid and examined by TEM. Characterization details are summarized in **Table S2**.

## Photocatalysis Experiments

### Photocatalytic selective oxidation of 4-methoxyphenyl methyl sulfide to 4-methoxyphenyl methyl sulfoxide

4-methoxyphenyl methyl sulfide (0.05 mmol), heterojunction comicelles (0.00002 mmol), dodecane (0.00005 mmol) and *d*<sub>6</sub>-EtOH (1 mL) were added to a 30 mL photo-reactor. Then the reaction mixture was stirred at 500 rpm for 1 h, followed by illuminating with a 300 W Xe lamp with a 420 nm cut-off filter ( $I = 10 \text{ A}$ ,  $780 \text{ nm} > \lambda > 420 \text{ nm}$ ,  $E = 135 \text{ mW/cm}^2$ ) for different time. A circulating cold bath outside the reactor kept the reaction temperature at 25°C. An oxygen ballon was used to charge the flask with oxygen at 1 atm. Conversion and selectivity of 4-methoxyphenyl methyl sulfoxide were confirmed by <sup>1</sup>H NMR with dodecane as the internal standard. The 4-methoxyphenyl methyl sulfide conversion and 4-methoxyphenyl methyl sulfoxide yield were calculated with the following equation:

$$\text{Conversion}(\%) = \frac{S_0 - S_{\text{Sulfide}}}{S_0} \times 100\% \quad (\text{S7})$$

Here,  $S_0$  is the initial integral area of  $-SCH_3$  in  $^1H$  NMR spectra,  $S_{\text{sulfide}}$  and  $S_{\text{sulfoxide}}$  are the particularly reaction time integral area of  $-SCH_3$  and  $-OSCH_3$  in  $^1H$  NMR spectra, respectively. The integral area of  $-CH_3$  in dodecane is defined as 1.

### Supporting Figures

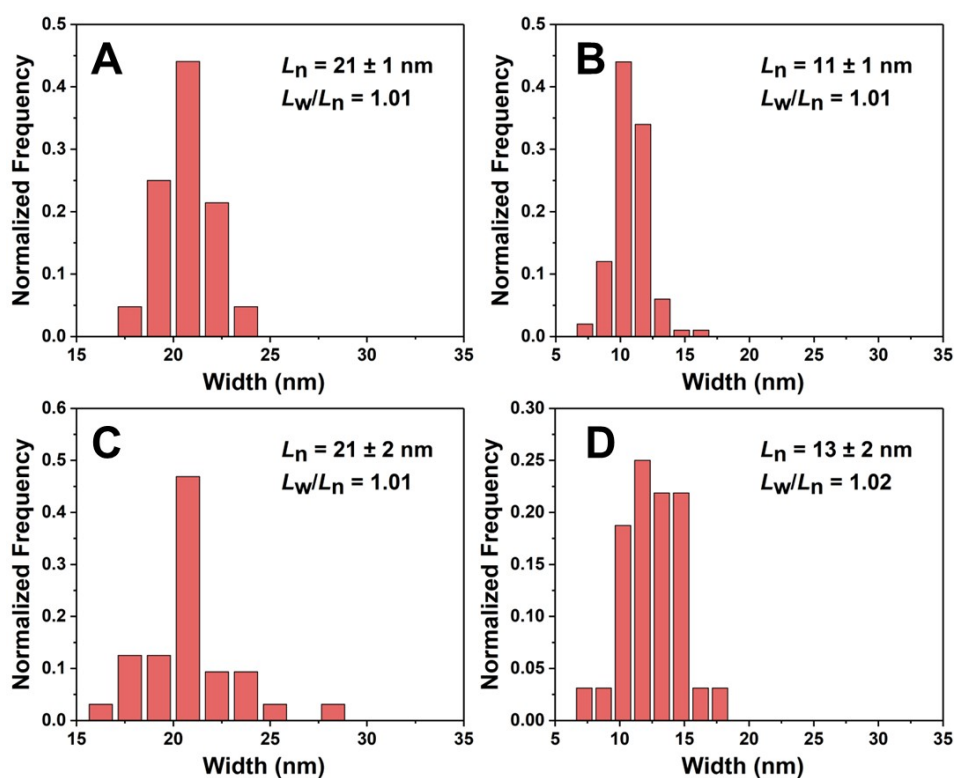

**Fig. S1** Contour width distribution histogram of individual fiber-like micelles of OPE<sub>9</sub>-*b*-P2VP<sub>56</sub> (A), individual fiber-like micelles of BT-OPE<sub>7</sub>-BT-*b*-PNIPAM<sub>36</sub> (B), end blocks (C) and central blocks (D) of comicelles of BT-OPE<sub>7</sub>-BT-*b*-PNIPAM<sub>36</sub>/OPE<sub>9</sub>-*b*-P2VP<sub>56</sub>.

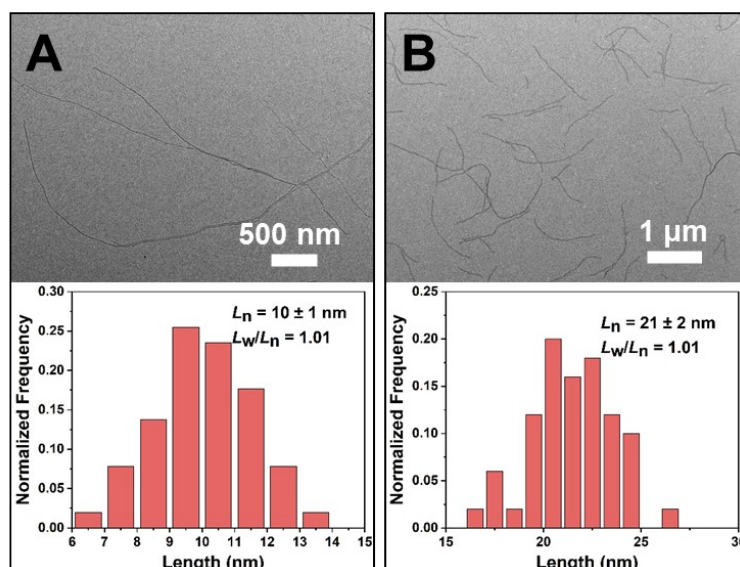

**Fig. S2** Contour width distribution histogram of fiber-like micelles of BT-OPE<sub>7</sub>-BT-*b*-PNIPAM<sub>36</sub>

(A), individual fiber-like micelles of OPE<sub>9</sub>-*b*-P2VP<sub>56</sub> (B).

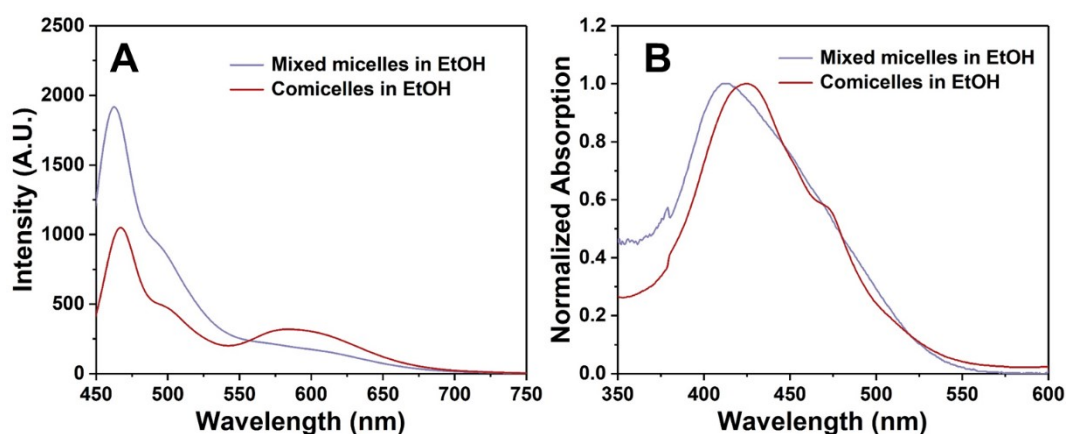

**Fig. S3** UV/vis (A) and FL (B) spectra of mixed micelles and comicelles in ethanol.

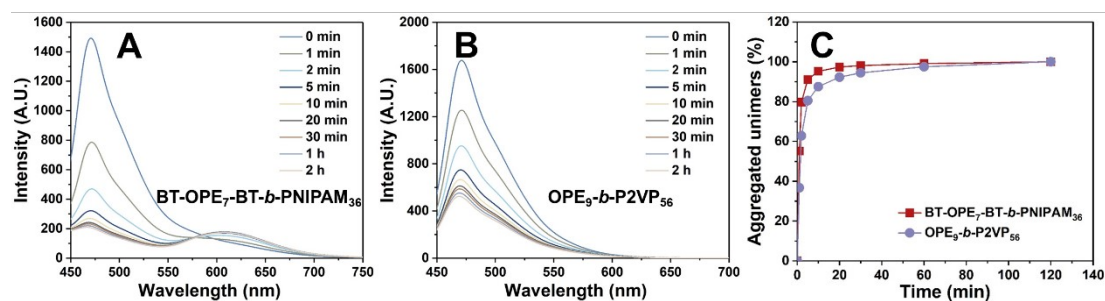

**Fig. S4** Fluorescence emission spectra of ethanol solutions of BT-OPE<sub>7</sub>-BT-*b*-PNIPAM<sub>36</sub> (A) and

OPE<sub>9</sub>-*b*-P2VP<sub>56</sub> (B) as they were cooled/aged at 25°C after heating at 80°C for 1 h (0.05 mg/mL).

(C) Dependence of calculated contents of aggregated unimers on cooling/aging time obtained on the basis of fluorescence results shown in Fig. S4A-B.

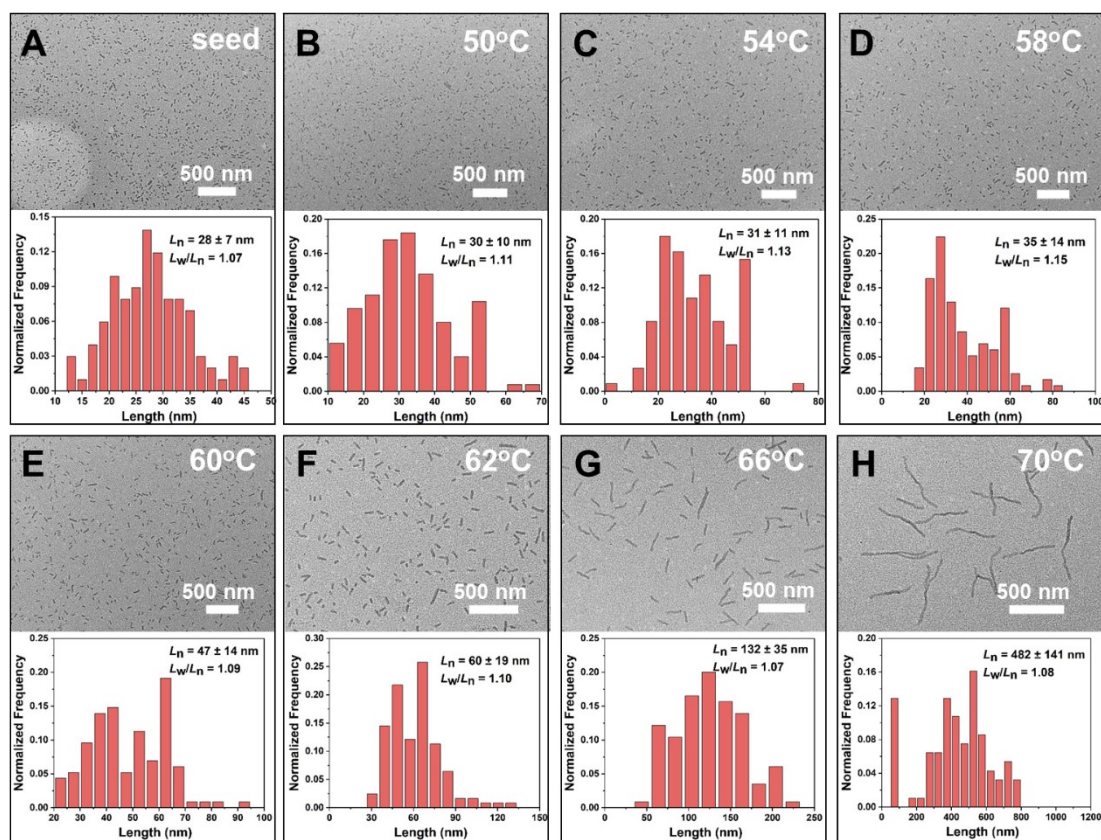

**Fig. S5** TEM images and contour length distribution histogram of co-seeds of BT-OPE<sub>7</sub>-BT-*b*-PNIPAM<sub>36</sub>/OPE<sub>9</sub>-*b*-P2VP<sub>56</sub> (A) and comicelles obtained by annealing the co-seeds at 50°C (B), 54°C (C), 58°C (D), 60°C (E), 62°C (F), 66°C (G) and 70°C (H).

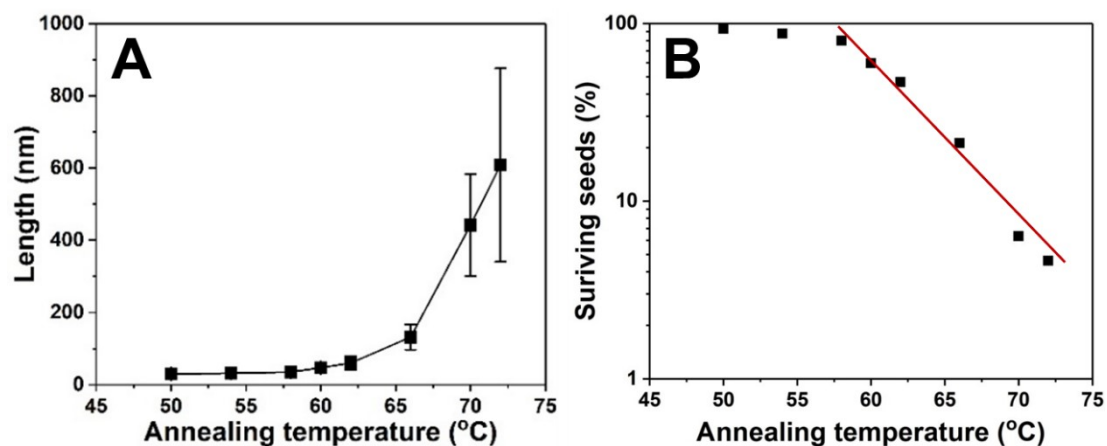

**Fig. S6**  $L_n$  of obtained comicelles of BT-OPE<sub>7</sub>-BT-*b*-PNIPAM<sub>36</sub>/OPE<sub>9</sub>-*b*-P2VP<sub>56</sub> (A) and semilogarithmic plot of fraction of surviving co-seeds (B) versus annealing temperature.

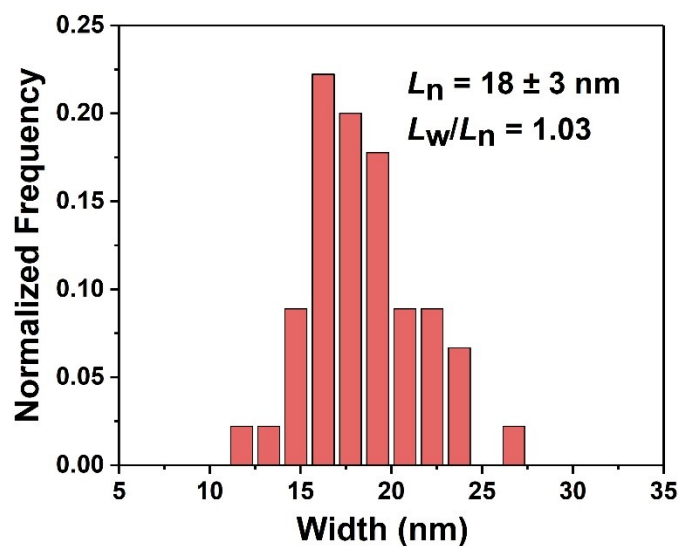

**Fig. S7** Contour width distribution histogram of comicelles of BT-OPE<sub>7</sub>-BT-*b*-PNIPAM<sub>36</sub>/OPE<sub>9</sub>-*b*-P2VP<sub>56</sub>.

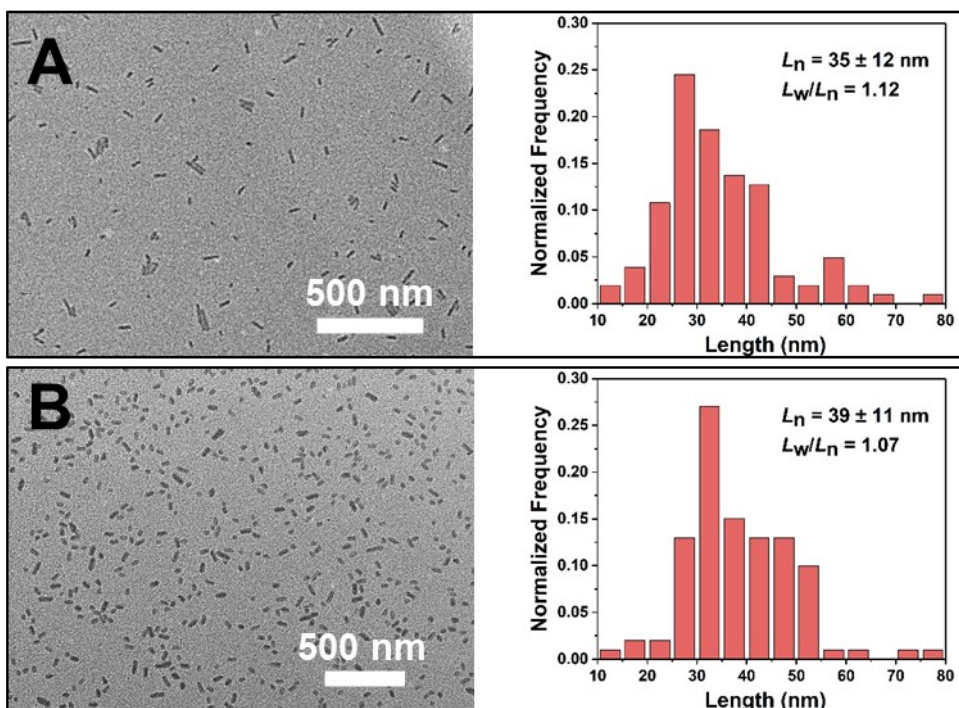

**Fig. S8** TEM images and length distribution histograms of individual seed micelles of BT-OPE<sub>7</sub>-

BT-*b*-PNIPAM<sub>36</sub> (A) and OPE<sub>9</sub>-*b*-P2VP<sub>56</sub> (B).

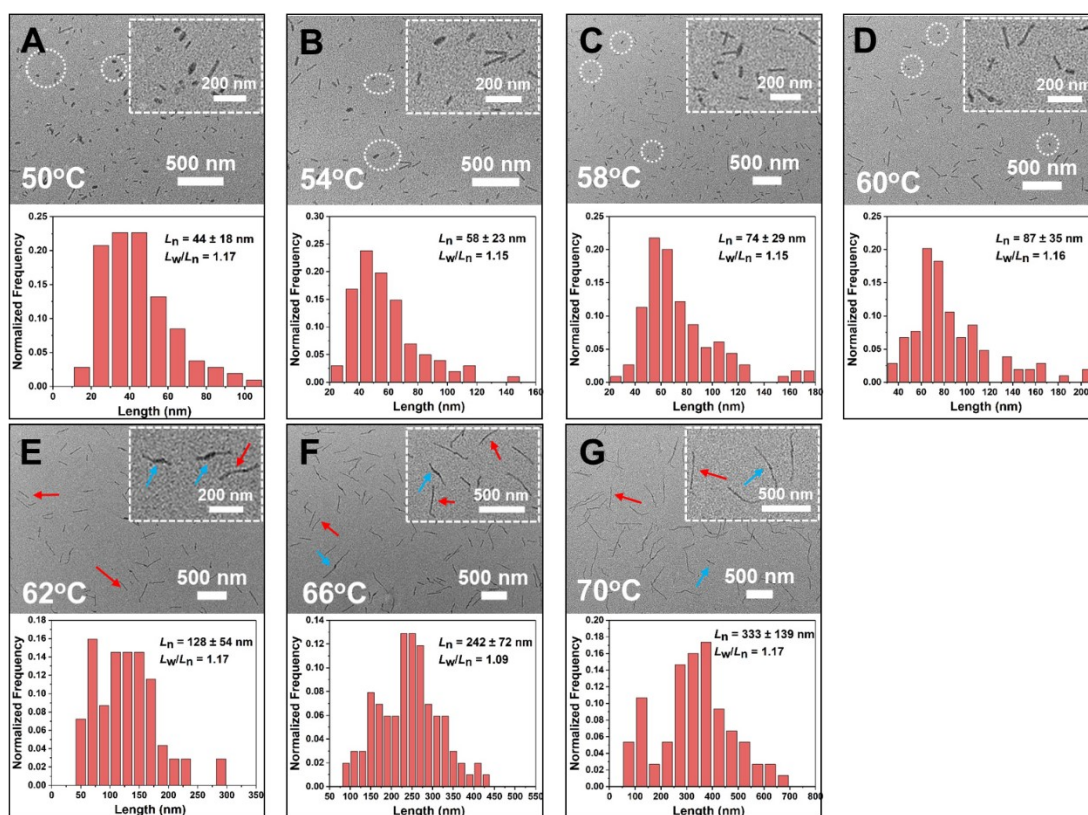

**Fig. S9** TEM images and contour length distribution histogram of comicelles obtained by

annealing mixed seed micelles of BT-OPE<sub>7</sub>-BT-*b*-PNIPAM<sub>36</sub> and OPE<sub>9</sub>-*b*-P2VP<sub>56</sub> at 50°C (A), 54°C (B), 58°C (C), 60°C (D), 62°C (E), 66°C (F) and 70°C (G).

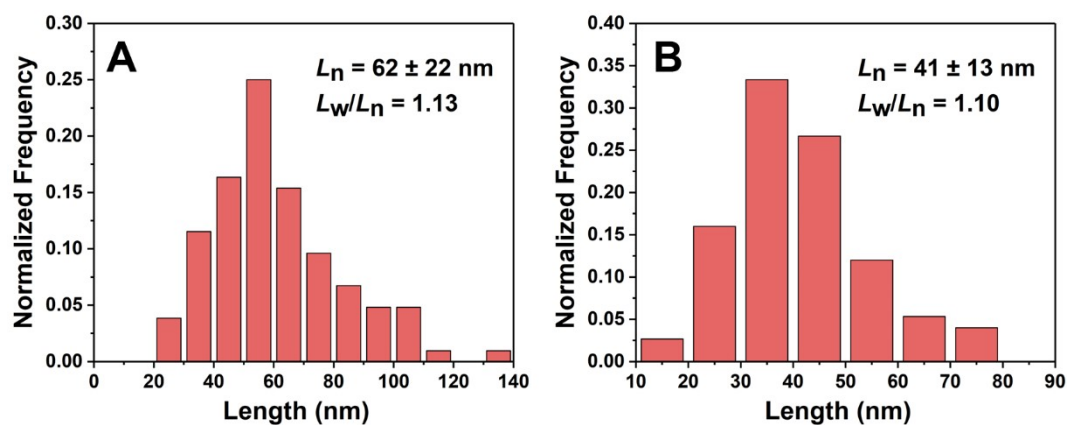

**Fig. S10** Contour length distribution histograms of micelles with width of 11 nm (A) and 21 nm (B) obtained by annealing the mixed-seeds at 50°C.

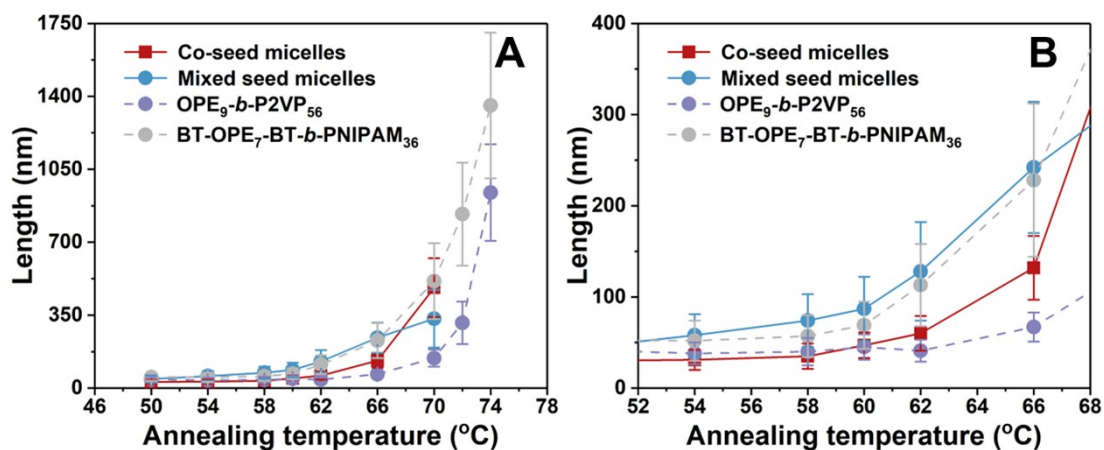

**Fig. S11** (A-B)  $L_n$  of obtained comicelles of co-self-seeding of co-seed micelles and mixed seed micelles, elongated micelles of BT-OPE<sub>7</sub>-BT-*b*-PNIPAM<sub>36</sub> and OPE<sub>9</sub>-*b*-P2VP<sub>56</sub> versus annealing temperature.

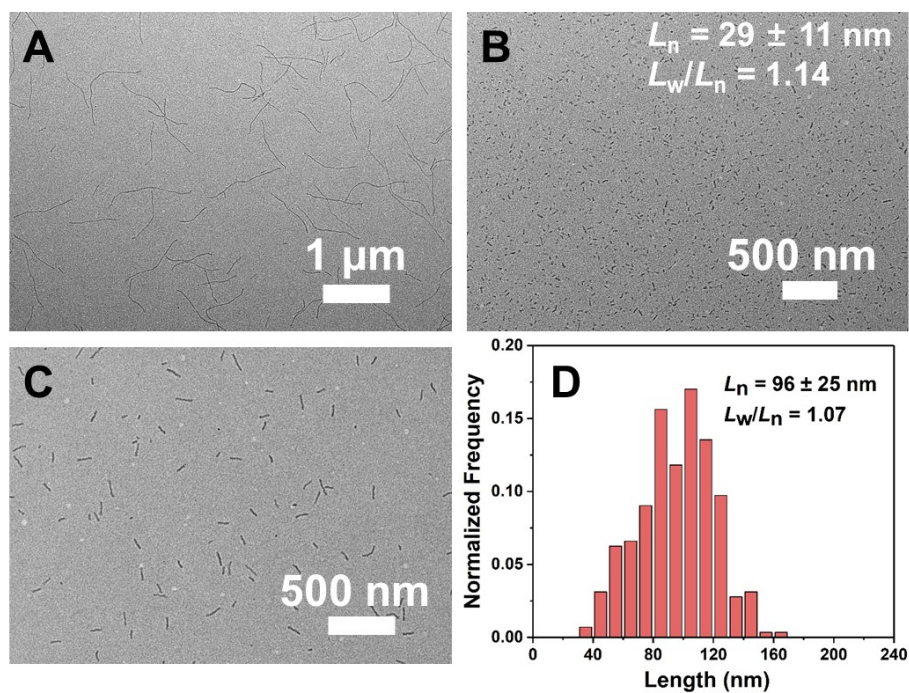

**Fig. S12** TEM images of heterojunction comicelles (A), co-seed micelles (B), co-self-seeding micelles (C) and length distribution histogram (D).

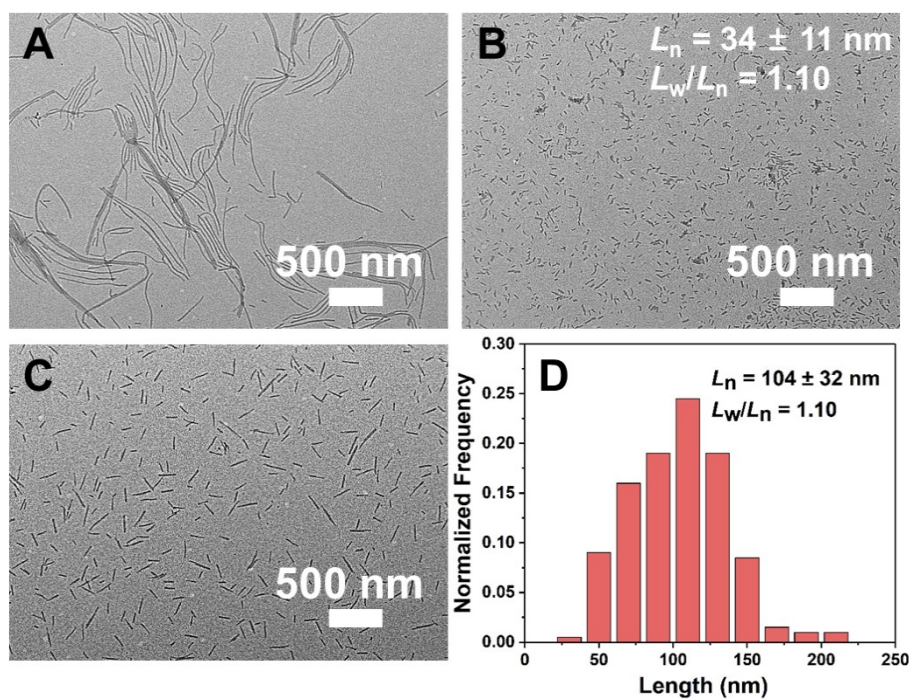

**Fig. S13** TEM images of BT-OPE<sub>7</sub>-BT-*b*-PNIPAM<sub>36</sub> long fiber-like micelles (A), seed micelles (B), self-seeding micelles (C) and length distribution histogram (D).

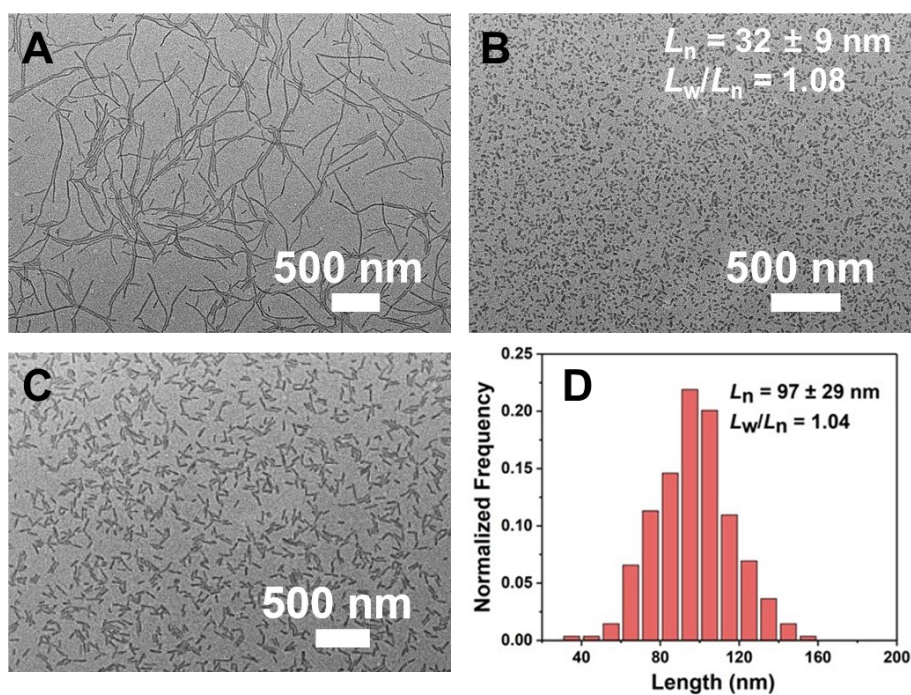

**Fig. S14** TEM images of  $\text{OPE}_9\text{-}b\text{-P2VP}_{56}$  long fiber-like micelles (A), seed micelles (B), self-seeding micelles (C) and length distribution histogram (D).

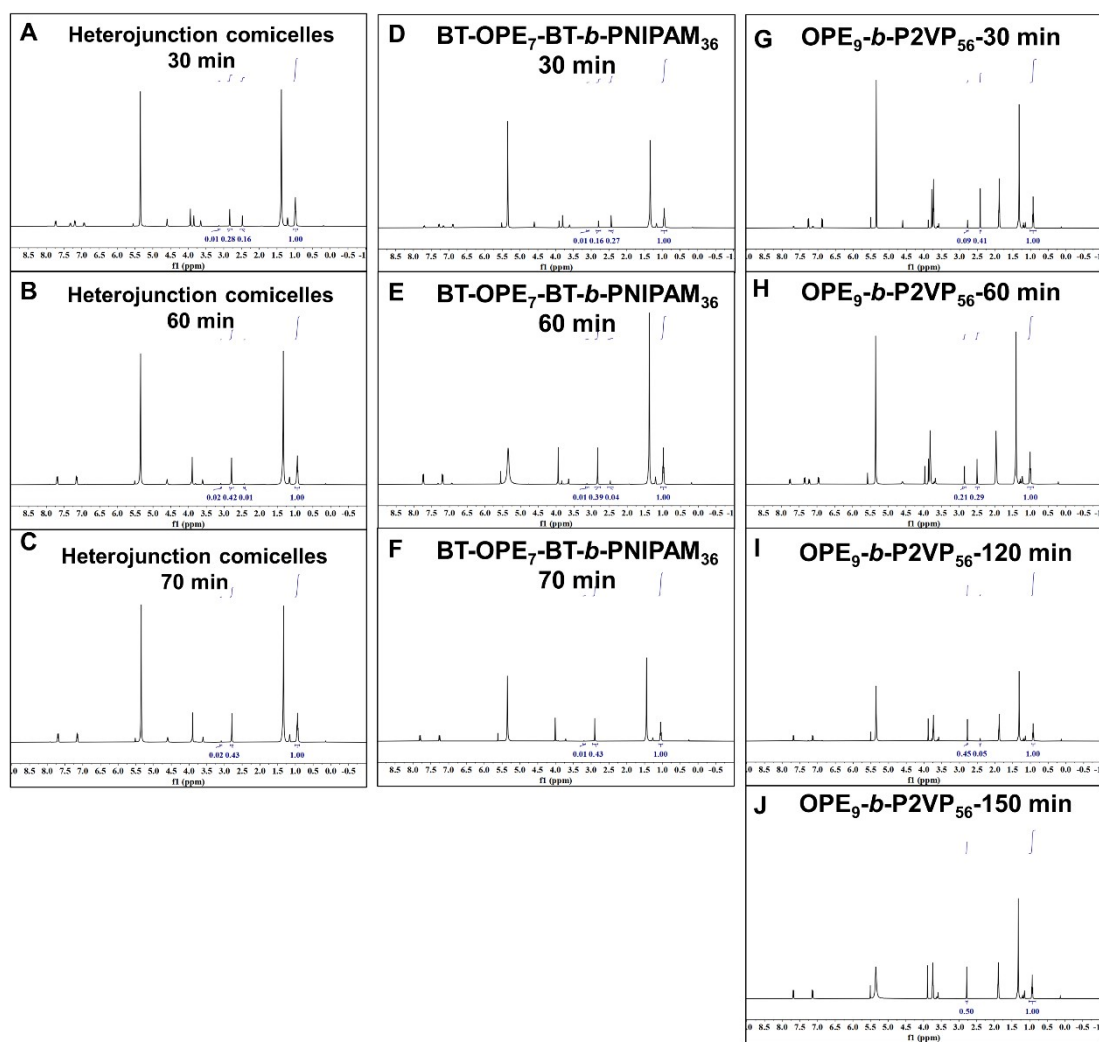

**Fig. S15**  $^1\text{H}$  NMR spectra (dodecane, 298 K, 400 MHz) of 4-methoxyphenyl methyl sulfide photooxidation in the presence of heterojunction comicelles, BT-OPE<sub>7</sub>-BT-*b*-PNIPAM<sub>36</sub> fiber-like micelles and OPE<sub>9</sub>-*b*-P2VP<sub>56</sub> fiber-like micelles as photocatalysts after irradiation at different time in *d*<sub>6</sub>-ethanol.

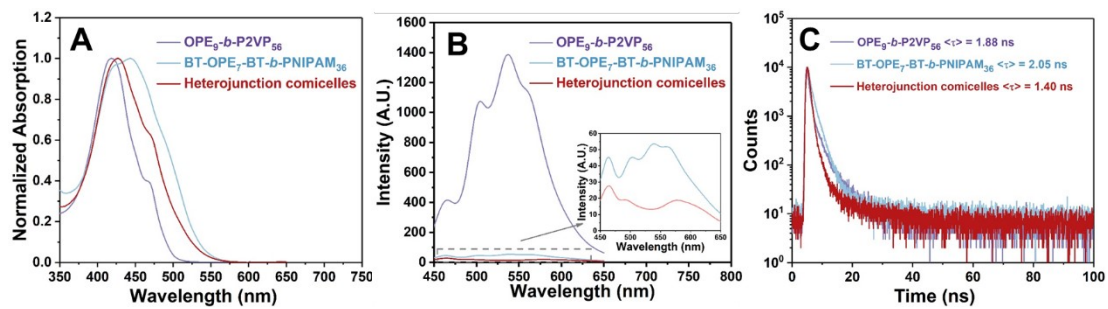

**Fig. S16** UV/vis spectra (A), FL spectra (B) and time-resolved fluorescence decay (C) of micelles of BT-OPE<sub>7</sub>-BT-*b*-PNIPAM<sub>36</sub>, OPE<sub>9</sub>-*b*-P2VP<sub>56</sub> and heterojunction comicelles.

## Supporting tables

**Table S1.** Characteristic of co-seed micelles and elongated comicelles of BT-OPE<sub>7</sub>-BT-*b*-PNIPAM<sub>36</sub>/OPE<sub>9</sub>-*b*-P2VP<sub>56</sub> obtained by co-self-seeding strategy ( $M_{\text{BT-OPE7-BT/OPE9}} = 1/1$ , 0.05 mg/mL).

| T/°C | $L_n$ (nm) | $L_w$ (nm) | $L_w/L_n^b$ | $\sigma^b$ (nm) | $\sigma/L_n^b$ |
|------|------------|------------|-------------|-----------------|----------------|
| seed | 28         | 30         | 1.07        | 7               | 0.26           |
| 50   | 30         | 34         | 1.11        | 10              | 0.33           |
| 54   | 31         | 35         | 1.13        | 11              | 0.36           |
| 58   | 35         | 41         | 1.15        | 14              | 0.39           |
| 60   | 47         | 51         | 1.09        | 14              | 0.30           |
| 62   | 60         | 66         | 1.10        | 19              | 0.31           |
| 66   | 132        | 141        | 1.07        | 35              | 0.27           |
| 70   | 482        | 523        | 1.08        | 141             | 0.29           |

<sup>a</sup> The mean length of micelles was calculated from measurements of over 200 individual micelles in multiple TEM images.

<sup>b</sup>  $L_n$ ,  $L_w$  and  $\sigma$  are the number-average micelle length, weight-average micelle length and standard deviation of micelle length distribution, respectively, as calculated from the histogram of the length distribution.

**Table S2.** Characteristic of separate seed micelles of BT-OPE<sub>7</sub>-BT-*b*-PNIPAM<sub>36</sub> and OPE<sub>9</sub>-*b*-P2VP<sub>56</sub> and elongated comicelles obtained by annealing the mixed-seeds ( $M_{\text{BT-OPE7-BT/OPE9}} = 1/1$ , 0.05 mg/mL).

| T/°C                                                         | $L_n$ (nm) | $L_w$ (nm) | $L_w/L_n^b$ | $\sigma^b$ (nm) | $\sigma/L_n^b$ |
|--------------------------------------------------------------|------------|------------|-------------|-----------------|----------------|
| BT-OPE <sub>7</sub> -BT- <i>b</i> -PNIPAM <sub>36</sub> seed | 35         | 39         | 1.12        | 12              | 0.34           |
| OPE <sub>9</sub> - <i>b</i> -P2VP <sub>56</sub> seed         | 39         | 42         | 1.07        | 11              | 0.27           |
| 50                                                           | 44         | 52         | 1.17        | 18              | 0.42           |
| 54                                                           | 58         | 67         | 1.15        | 23              | 0.39           |
| 58                                                           | 74         | 86         | 1.15        | 29              | 0.39           |
| 60                                                           | 87         | 101        | 1.16        | 35              | 0.40           |
| 62                                                           | 128        | 151        | 1.17        | 54              | 0.42           |
| 66                                                           | 242        | 263        | 1.09        | 72              | 0.30           |
| 70                                                           | 333        | 390        | 1.17        | 139             | 0.42           |

<sup>a</sup> The mean length of micelles was calculated from measurements of over 200 individual micelles in multiple TEM images.

<sup>b</sup>  $L_n$ ,  $L_w$  and  $\sigma$  are the number-average micelle length, weight-average micelle length and standard deviation of micelle length distribution, respectively, as calculated from the histogram of the length distribution.

**Table S3.** Characteristic of micelles of BT-OPE<sub>7</sub>-BT-*b*-PNIPAM<sub>36</sub>, OPE<sub>9</sub>-*b*-P2VP<sub>56</sub> and heterojunction comicelles used for photocatalytic selective oxidation reactions.

| Samples                                                 | $L_n$ (nm) | $L_w$ (nm) | $L_w/L_n^b$ | $\sigma^b$ (nm) | $\sigma/L_n^b$ |
|---------------------------------------------------------|------------|------------|-------------|-----------------|----------------|
| BT-OPE <sub>7</sub> -BT- <i>b</i> -PNIPAM <sub>36</sub> | 104        | 114        | 1.10        | 32              | 0.31           |
| OPE <sub>9</sub> - <i>b</i> -P2VP <sub>56</sub>         | 97         | 101        | 1.04        | 20              | 0.20           |
| heterojunction comicelles                               | 96         | 103        | 1.07        | 25              | 0.26           |

<sup>a</sup> The mean length of micelles was calculated from measurements of over 200 individual micelles in multiple TEM images.

<sup>b</sup>  $L_n$ ,  $L_w$  and  $\sigma$  are the number-average micelle length, weight-average micelle length and standard deviation of micelle length distribution, respectively, as calculated from the histogram of the length distribution.

**Table S4. Photocatalytic oxidation of 4-methoxyphenyl methyl sulfide <sup>a</sup>**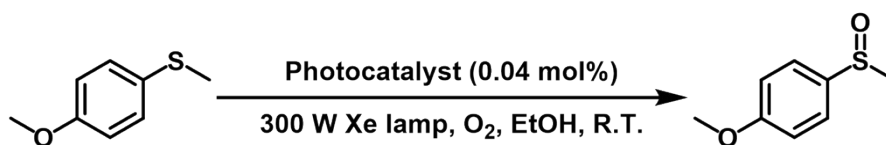

| Entry | Photocatalyst                                                         | Time<br>(min) | Conv.<br>(%) <sup>b</sup> | Select.<br>(%) <sup>b</sup> |
|-------|-----------------------------------------------------------------------|---------------|---------------------------|-----------------------------|
| 1     | OPE <sub>9</sub> - <i>b</i> -P2VP <sub>56</sub> nanofibers            | 150           | >99                       | 99                          |
| 2     | BT-OPE <sub>7</sub> -BT- <i>b</i> -PNIPAM <sub>36</sub><br>nanofibers | 70            | >99                       | 99                          |
| 3     | heterojunction-micelles                                               | 70            | >99                       | 99                          |

<sup>a</sup> Reaction conditions: 4-methoxyphenyl methyl sulfide (0.05 mmol), photocatalyst (0.00002 mmol), *d*<sub>6</sub>-EtOH (1 mL), 1 atm O<sub>2</sub>, irradiation with a 300 W Xe lamp (780 > λ > 420 nm, E = 135 mW/cm<sup>2</sup>) at room temperature unless otherwise noted.

<sup>b</sup> Determined by <sup>1</sup>H NMR with dodecane as the internal standard.

**Table S5.** Comparison of selective oxidation of 4-methoxyphenyl methyl sulfide catalytic performance of heterojunction comicelles, BT-OPE<sub>7</sub>-BT-b-PNIPAM<sub>36</sub> and OPE<sub>9</sub>-b-P2VP<sub>56</sub> fiber-like micelles as photocatalysts.

| Samples                                        | Time (min) | S <sub>sulfide</sub> <sup>a</sup> | S <sub>sulfoxide</sub> <sup>a</sup> | S <sub>sulfone</sub> <sup>a</sup> | Conversion (%) <sup>b</sup> |
|------------------------------------------------|------------|-----------------------------------|-------------------------------------|-----------------------------------|-----------------------------|
| Heterojunction comicelles                      | 30         | 0.16                              | 0.28                                | 0.01                              | 64                          |
|                                                | 60         | 0.01                              | 0.42                                | 0.02                              | 98                          |
|                                                | 70         | 0                                 | 0.42                                | 0.02                              | >99                         |
| BT-OPE <sub>7</sub> -BT-b-PNIPAM <sub>36</sub> | 30         | 0.27                              | 0.16                                | 0.01                              | 39                          |
|                                                | 60         | 0.04                              | 0.39                                | 0.01                              | 91                          |
|                                                | 70         | 0                                 | 0.43                                | 0.01                              | >99                         |
| OPE <sub>9</sub> -b-P2VP <sub>56</sub>         | 30         | 0.41                              | 0.09                                | 0                                 | 18                          |
|                                                | 60         | 0.29                              | 0.21                                | 0                                 | 42                          |
|                                                | 120        | 0.05                              | 0.45                                | 0                                 | 90                          |
|                                                | 150        | 0                                 | 0.50                                | 0                                 | >99                         |

<sup>a</sup> S<sub>sulfide</sub>, S<sub>sulfoxide</sub> and S<sub>sulfone</sub> are the particularly reaction time integral area of -SCH<sub>3</sub>, -OSCH<sub>3</sub> and -O<sub>2</sub>SCH<sub>3</sub> in <sup>1</sup>H NMR spectra, respectively. The integral area of -CH<sub>3</sub> in dodecane is defined as 1.

$$\text{Conversion}(\%) = \frac{S_0 - S_{\text{sulfide}}}{S_0} \times 100\%$$

<sup>b</sup> , S<sub>0</sub> = S<sub>sulfide</sub> + S<sub>sulfoxide</sub> + S<sub>sulfone</sub>

**Table S6.** Raw data corresponding particularly to photophysical properties of photocatalysts.

| Photocatalyst                                                      | $\lambda_{\max}$ (nm) <sup>a</sup> | $I_{530}$ <sup>b</sup> | $\langle\tau\rangle$ (ns) <sup>c</sup> |
|--------------------------------------------------------------------|------------------------------------|------------------------|----------------------------------------|
| OPE <sub>9</sub> - <i>b</i> -P2VP <sub>56</sub> nanofibers         | 418                                | 1305                   | 1.88                                   |
| BT-OPE <sub>7</sub> -BT- <i>b</i> -PNIPAM <sub>36</sub> nanofibers | 443                                | 50.6                   | 2.05                                   |
| heterojunction-micelles                                            | 427                                | 13.3                   | 1.40                                   |

<sup>a</sup>  $\lambda_{\max}$  is the maximum of absorption peak in UV/vis spectra.

<sup>b</sup>  $I_{530}$  is the fluorescence intensity at 530 nm in FL spectra.

<sup>c</sup>  $\langle\tau\rangle$  is the mean excited state lifetimes obtained by time-resolved fluorescence decay analysis.

**Table S7.** Fitting parameters from fluorescence decay measurements and calculated mean lifetimes for micellar solutions of heterojunction comicelles ( $2 \times 10^{-6}$  mol/L in ethanol), BT-OPE<sub>7</sub>-BT-*b*-PNIPAM<sub>36</sub> fiber-like micelles ( $2 \times 10^{-6}$  mol/L in ethanol) and OPE<sub>9</sub>-*b*-P2VP<sub>56</sub> ( $2 \times 10^{-6}$  mol/L in ethanol) under Ar. <sup>a</sup>

| Samples                                                    | $\tau_1$ (ns)               | $\tau_2$ (ns)               | $\tau_3$ (ns)               | $\langle \tau \rangle$ (ns) | $\chi^2$ |
|------------------------------------------------------------|-----------------------------|-----------------------------|-----------------------------|-----------------------------|----------|
| Heterojunction<br>comicelles                               | 0.76<br>( $B_1 = 86.61\%$ ) | 2.62<br>( $B_2 = 10.35\%$ ) | 14.87<br>( $B_3 = 3.04\%$ ) | 1.40                        | 1.29     |
| BT-OPE <sub>7</sub> -BT-<br><i>b</i> -PNIPAM <sub>36</sub> | 0.91<br>( $B_1 = 37.14\%$ ) | 2.16<br>( $B_2 = 60.87\%$ ) | 20.12<br>( $B_3 = 2.00\%$ ) | 2.05                        | 1.21     |
| OPE <sub>9</sub> - <i>b</i> -<br>P2VP <sub>56</sub>        | 0.61<br>( $B_1 = 52.25\%$ ) | 2.36<br>( $B_2 = 40.00\%$ ) | 7.98<br>( $B_3 = 7.75\%$ )  | 1.88                        | 1.24     |

<sup>a</sup> The “intensity-weighted” mean decay times  $\langle \tau \rangle$  were obtained by  $\langle \tau \rangle = B_1\tau_1 + B_2\tau_2 + B_3\tau_3$  ( $B_1 + B_2 + B_3 = 1$ ).

## REFERENCES

- 1 J. C. Nie, Z. Q. Wang, X. Y. Huang, G. L. Lu and C. Feng, *Macromolecules*, 2020, **53**, 6299-6313.
- 2 F. F. Huang, J. Y. Ma, J. C. Nie, B. B. Xu, X. Y. Huang, G. L. Lu, M. A. Winnik and C. Feng, *J. Am. Chem. Soc.*, 2024, **146**, 25137-25150.
